# Supplementary material for: Pooled genetic perturbation screens with image-based phenotypes
Source: Springer Nature journal article supplement (doi:10.1038/s41596-021-00653-8), 2022-01-12
Supplement: MOESM1 [file 41596_2021_653_MOESM1_ESM12.pdf]

---

## Supplementary information

---

# Pooled genetic perturbation screens with image-based phenotypes

---

In the format provided by the  
authors and unedited

**a**

| Cell line | Cells with $\geq 1$ counts<br>for most abundant<br>mapped read* | Cells with $\geq 2$ counts<br>for most abundant<br>mapped read* | NFkB screen<br>published | Notes                                                     | Recommended                              |
|-----------|-----------------------------------------------------------------|-----------------------------------------------------------------|--------------------------|-----------------------------------------------------------|------------------------------------------|
| HeLa      | 94%                                                             | 89.0%                                                           | yes                      |                                                           | yes                                      |
| A549      | -                                                               | -                                                               | yes                      |                                                           | yes                                      |
| A375      | 92.8%                                                           | 86.3%                                                           |                          |                                                           | yes                                      |
| HT1080    | 91.8%                                                           | 91.0%                                                           |                          |                                                           | yes                                      |
| U2-OS     | 91.8%                                                           | 84.7%                                                           |                          | large surface area<br>reduces cell throughput             | yes                                      |
| HCT116    | 95.5%                                                           | 91.6%                                                           | yes                      | cells tend to clump                                       | only if required by<br>phenotyping assay |
| HEK293    | 93.2%                                                           | 79.3%                                                           |                          | high background<br>staining, low<br>sequencing spot count | only if required by<br>phenotyping assay |
| THP-1     | -                                                               | -                                                               |                          | low sequencing spot<br>count                              | no                                       |

\*cell lines compared in the same experiment on a single plate,  
mean of 2 replicate wells with 4 cycles of sequencing, 10 sgRNAs in the CROPseq vector

**b**

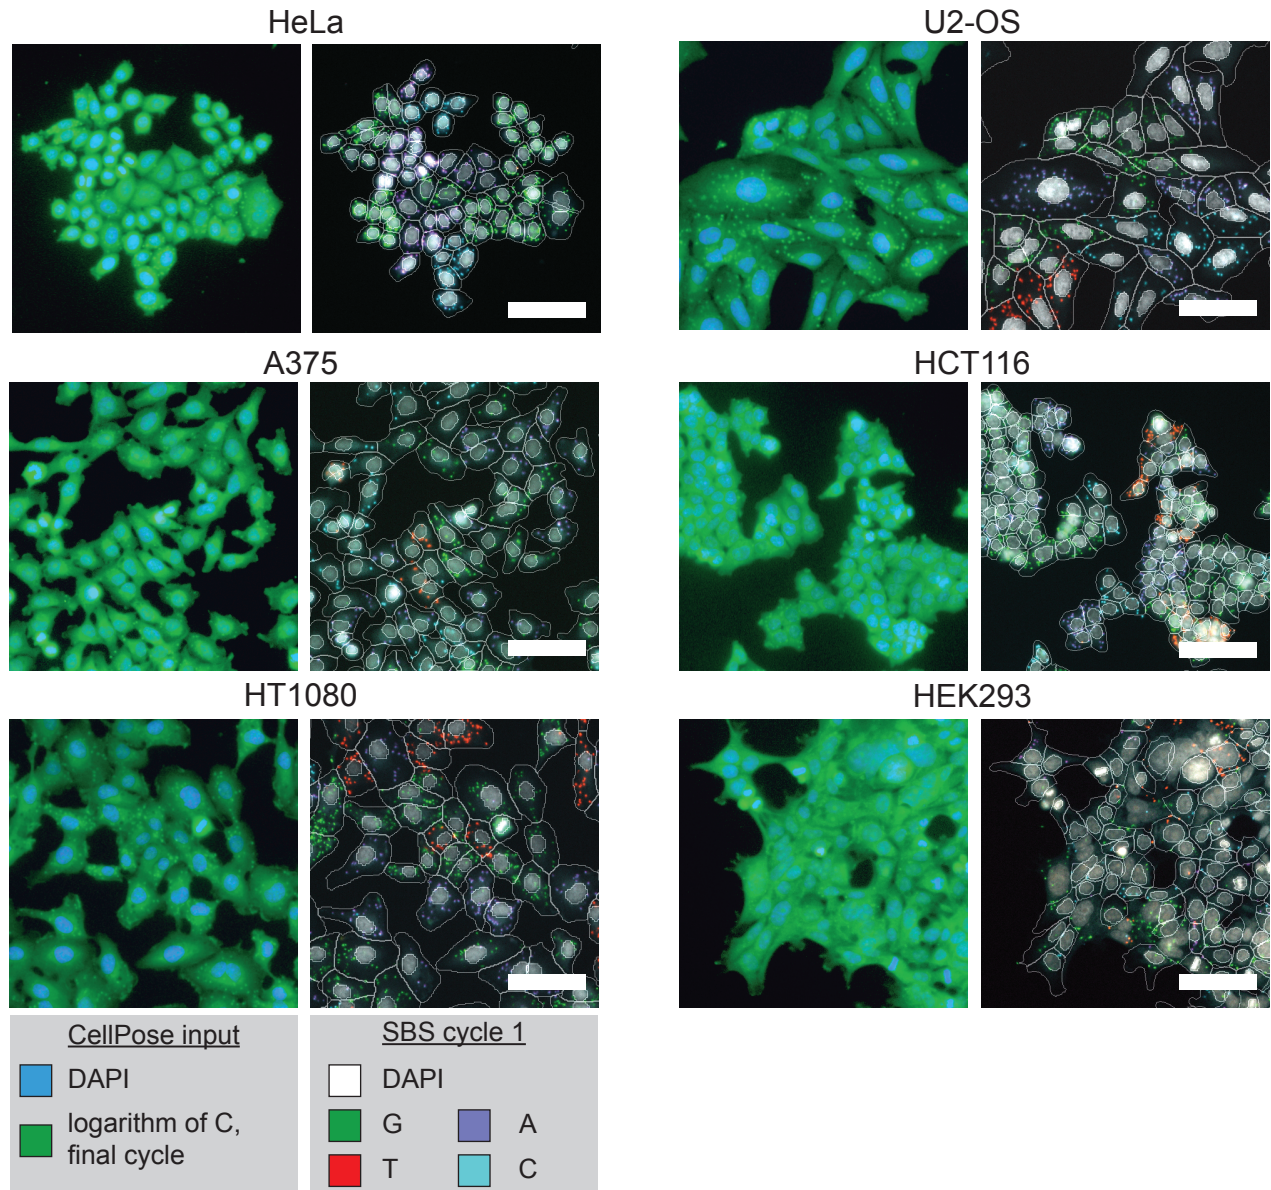

**Supplementary Figure 1.** Cell line comparison. (a) Suitability of example cell lines for optical pooled screening. NFkB screens were published in ref.<sup>43</sup> (b) Example cell and nuclear segmentation using CellPose, a generalist algorithm based on a deep learning model trained on diverse cell and image types. For each cell line, the left panel shows the exact RGB input provided to CellPose, and the right panel shows segmentations using the “cyto” and “nuclei” models in single-model mode (scale bar, 100  $\mu$ m). All cell lines were analyzed identically, varying only in a single “diameter” parameter automatically generated by the CellPose “cyto” calibration model. Segmentation of a 1.2mm x 1.2mm field of view took ~4 min on 1 CPU.

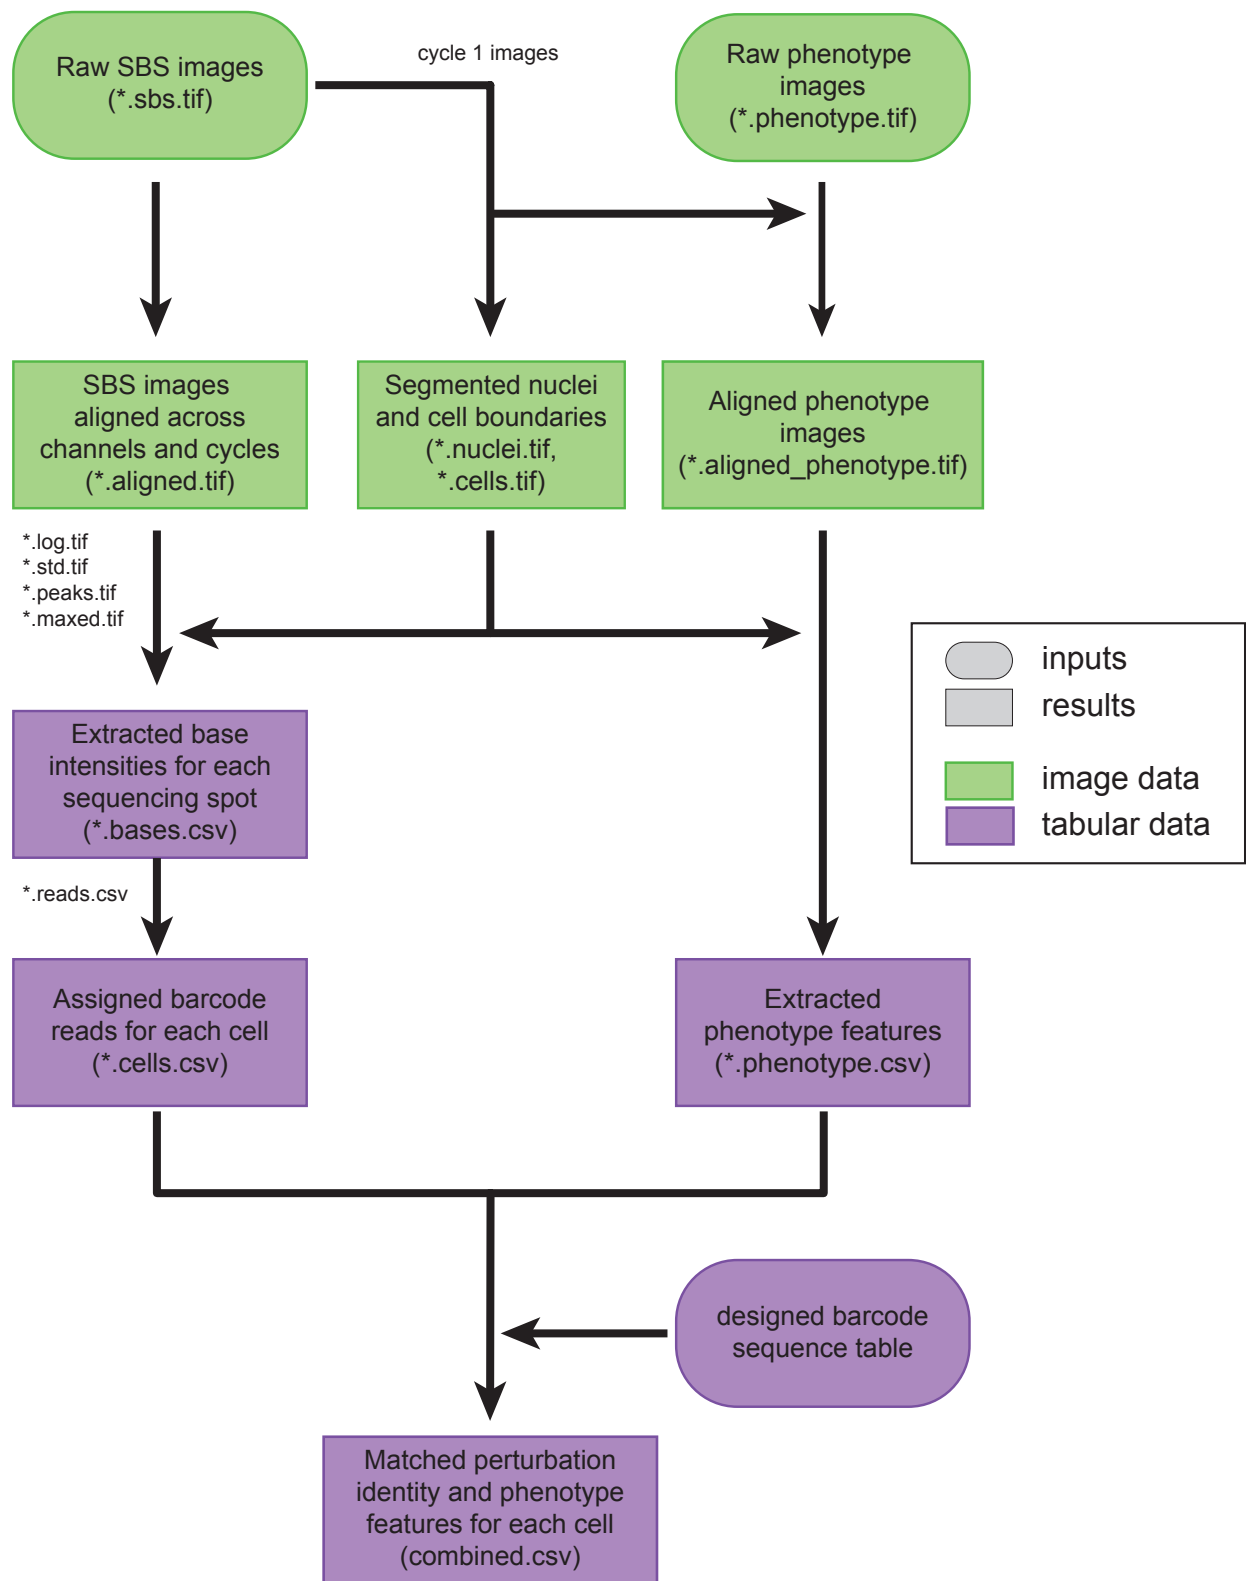

**Supplementary Figure 2.** Image analysis pipeline overview. Flowchart demonstrating the major steps of the screen processing pipeline. Input data are represented by rounded shapes; image and tabular data are in green and purple, respectively.
