# Supplementary material for: Pooled genetic perturbation screens with image-based phenotypes
Source: Springer Nature journal article supplement (doi:10.1038/s41596-021-00653-8), 2022-01-12
Supplement: MOESM2 [file 41596_2021_653_MOESM2_ESM13.xlsx]

## Sheet: Supplementary Table 1
Supplementary Table 1. Spreadsheet calculator for estimating the scale of an optical pooled screen.
		variable	value	notes
screen parameters		genes	1000
		sgRNAs per gene	4
		nontargeting guides	100
		analyzed cells per sgRNA	100
		oversampling factor	2
		SBS cycles	10
		cell density in assay (cm**-2)	50000
microscope parameters		field of view (10x magnification) (mm**2)	1.77
		SBS acquisition time per position (ms)	700
constants		target MOI	0.05
		CFU per library element	300
		cells per library element	300
		lentiviral titer (CFU / uL)	5000
		6-well plate culture area (1 well, cm**2)	9.6
		chemistry time for 1 cycle (min)	60
		cell SBS mapping rate	0.7
		cell phenotype filter rate	0.7	e.g., exclude mitotic cells or cells that are difficult to segment accurately
cloning		total library elements	4100
		minimum CFU	1230000
lentiviral infection		cells in lentiviral infection	24600000
		cells successfully infected	1230000
		lentiviral volume (uL)	246
microscopy		image positions per well of 6-well plate	542.373
		cells per image	885
		cells imaged per well of 6-well plate	480000
		imaging time for one SBS cycle (min)	6.32768
		target total cells analyzed	820000
		target total cells imaged	1.67347e+06
		number of wells of 6-well plates	3.48639
summary		target total cells analyzed	820000
		number of wells of 6-well plates	3.48639
		SBS cycles	10
		SBS imaging time for all cycles (hours)	3.6768
		chemistry time for all cycles (hours)	10

## Sheet: Supplementary Table 2
Supplementary Table 2. Oligo pool dialout primer sequences.
Dialout primer pair	Forward primer		Reverse primer
	Name	Oligo sequence (dialout priming region in CAPS; overhang is NGS P5 adapater sequence)	Name	Oligo sequence (dialout priming region in CAPS; overhang is NGS P7 adapater sequence)
1	Dialout_FWD_P5_1	ctctttccctacacgacgctcttccgatctCTTAAACCGGCCAACATACC	Dialout_REV_P7_1	ctggagttcagacgtgtgctcttccgatctATGCTACTCGTTCCTTTCGA
2	Dialout_FWD_P5_2	ctctttccctacacgacgctcttccgatctTGAGCCTTATGATTTCCCGT	Dialout_REV_P7_2	ctggagttcagacgtgtgctcttccgatctGTCCGTTTTCCTGAATGAGC
3	Dialout_FWD_P5_3	ctctttccctacacgacgctcttccgatctCGTTCTAAACGGCTAGATGC	Dialout_REV_P7_3	ctggagttcagacgtgtgctcttccgatctAGTCTGTCTTTCCCCTTTCC
4	Dialout_FWD_P5_4	ctctttccctacacgacgctcttccgatctGTATCCGAAGCGTGGAGTAT	Dialout_REV_P7_4	ctggagttcagacgtgtgctcttccgatctCAGGTATGCGTAGGAGTCAA
5	Dialout_FWD_P5_5	ctctttccctacacgacgctcttccgatctCTTGTTATGGACGAGTTGCC	Dialout_REV_P7_5	ctggagttcagacgtgtgctcttccgatctTTAATGGCGCGTTCATACTG
6	Dialout_FWD_P5_6	ctctttccctacacgacgctcttccgatctTATTCATGCTTGGACGGACT	Dialout_REV_P7_6	ctggagttcagacgtgtgctcttccgatctACTATGTACCGCTTGTTGGA
7	Dialout_FWD_P5_7	ctctttccctacacgacgctcttccgatctATCGACAATGGTATGGCTGA	Dialout_REV_P7_7	ctggagttcagacgtgtgctcttccgatctTATGTCTCCTAGCCACTCCT
8	Dialout_FWD_P5_8	ctctttccctacacgacgctcttccgatctGTCCTAGTGAGGAATACCGG	Dialout_REV_P7_8	ctggagttcagacgtgtgctcttccgatctCCGAAGAATCGCAGATCCTA
9	Dialout_FWD_P5_9	ctctttccctacacgacgctcttccgatctTTAGATAGGTGTGTAGGCGC	Dialout_REV_P7_9	ctggagttcagacgtgtgctcttccgatctTAAGGTGCGTACTAGCTGAC
10	Dialout_FWD_P5_10	ctctttccctacacgacgctcttccgatctTTCCGTTTATGCTTTCCAGC	Dialout_REV_P7_10	ctggagttcagacgtgtgctcttccgatctTCCTTGGAGTTTAGAGCGAG
11	Dialout_FWD_P5_11	ctctttccctacacgacgctcttccgatctGTATAGTTTGTGCGGTGGTC	Dialout_REV_P7_11	ctggagttcagacgtgtgctcttccgatctATCAATCCCCTACACCTTCG
12	Dialout_FWD_P5_12	ctctttccctacacgacgctcttccgatctTCAGCCTTTCATTGATTGCG	Dialout_REV_P7_12	ctggagttcagacgtgtgctcttccgatctTTCCTTGATACCGTAGCTCG
13	Dialout_FWD_P5_13	ctctttccctacacgacgctcttccgatctAGGGTCGTGGTTAAAGGTAC	Dialout_REV_P7_13	ctggagttcagacgtgtgctcttccgatctCGTTTCTTTCCGGTCGTTAG
14	Dialout_FWD_P5_14	ctctttccctacacgacgctcttccgatctTGCAAGTGTACAAATCCAGC	Dialout_REV_P7_14	ctggagttcagacgtgtgctcttccgatctGAACGGTGATCCCTTTCCTA
15	Dialout_FWD_P5_15	ctctttccctacacgacgctcttccgatctCTTAAGGTTTGCCCATTCCC	Dialout_REV_P7_15	ctggagttcagacgtgtgctcttccgatctTGTTATAGCTTCCACGGTGT
16	Dialout_FWD_P5_16	ctctttccctacacgacgctcttccgatctTGGTTCGTTAGTCGATCTCC	Dialout_REV_P7_16	ctggagttcagacgtgtgctcttccgatctAGACGGGATTTTACTGGGTC
17	Dialout_FWD_P5_17	ctctttccctacacgacgctcttccgatctTTCTGTAAGTTTCGTCGGGA	Dialout_REV_P7_17	ctggagttcagacgtgtgctcttccgatctCTAAACACCGCACCTCACTA
18	Dialout_FWD_P5_18	ctctttccctacacgacgctcttccgatctTTGACGTACGTAGGTTCTCC	Dialout_REV_P7_18	ctggagttcagacgtgtgctcttccgatctGAACACAACTACACTGACGC
19	Dialout_FWD_P5_19	ctctttccctacacgacgctcttccgatctGAGATGAGTAGACGAGTGGG	Dialout_REV_P7_19	ctggagttcagacgtgtgctcttccgatctATGGTCACTGACTCGCATTA
20	Dialout_FWD_P5_20	ctctttccctacacgacgctcttccgatctCTTTGGGCTTTCAGATGAGC	Dialout_REV_P7_20	ctggagttcagacgtgtgctcttccgatctCAAAGATTTCTGTCGGTCGG
21	Dialout_FWD_P5_21	ctctttccctacacgacgctcttccgatctTGTCATATGCTAACGTCCGT	Dialout_REV_P7_21	ctggagttcagacgtgtgctcttccgatctTGGCTACTTTCTTAGCGGAA

## Sheet: Supplementary Table 3
Supplementary Table 3. Primer sequences for NGS library preparation.
Name	Oligo sequence	Purpose
oNGS_CROPseq-puro_P5	ACACGACGCTCTTCCGATCTtcttgtggaaaggacgaaac	Amplifying sgRNA sequences from plasmid or integrated copies of the CROPseq-puro vector for NGS validation
oNGS_CROPseq-puro_P7	CTGGAGTTCAGACGTGTGCTCTTCCGATCTaagcaccgactcggtgccac	Amplifying sgRNA sequences from plasmid or integrated copies of the CROPseq-puro vector for NGS validation
oNGS_TruSeq_P5_1	aatgatacggcgaccaccgagatctacacTATAGCCTacactctttccctacacgacgct	P5 (forward) TruSeq indexing PCR primer, index sequence in CAPS
oNGS_TruSeq_P5_2	aatgatacggcgaccaccgagatctacacATAGAGGCacactctttccctacacgacgct	P5 (forward) TruSeq indexing PCR primer, index sequence in CAPS
oNGS_TruSeq_P5_3	aatgatacggcgaccaccgagatctacacCCTATCCTacactctttccctacacgacgct	P5 (forward) TruSeq indexing PCR primer, index sequence in CAPS
oNGS_TruSeq_P5_4	aatgatacggcgaccaccgagatctacacGGCTCTGAacactctttccctacacgacgct	P5 (forward) TruSeq indexing PCR primer, index sequence in CAPS
oNGS_TruSeq_P5_5	aatgatacggcgaccaccgagatctacacAGGCGAAGacactctttccctacacgacgct	P5 (forward) TruSeq indexing PCR primer, index sequence in CAPS
oNGS_TruSeq_P5_6	aatgatacggcgaccaccgagatctacacTAATCTTAacactctttccctacacgacgct	P5 (forward) TruSeq indexing PCR primer, index sequence in CAPS
oNGS_TruSeq_P5_7	aatgatacggcgaccaccgagatctacacCAGGACGTacactctttccctacacgacgct	P5 (forward) TruSeq indexing PCR primer, index sequence in CAPS
oNGS_TruSeq_P5_8	aatgatacggcgaccaccgagatctacacGTACTGACacactctttccctacacgacgct	P5 (forward) TruSeq indexing PCR primer, index sequence in CAPS
oNGS_TruSeq_P5_9	aatgatacggcgaccaccgagatctacacTCATCACAacactctttccctacacgacgct	P5 (forward) TruSeq indexing PCR primer, index sequence in CAPS
oNGS_TruSeq_P5_10	aatgatacggcgaccaccgagatctacacAAATGGGTacactctttccctacacgacgct	P5 (forward) TruSeq indexing PCR primer, index sequence in CAPS
oNGS_TruSeq_P5_11	aatgatacggcgaccaccgagatctacacAACAGACAacactctttccctacacgacgct	P5 (forward) TruSeq indexing PCR primer, index sequence in CAPS
oNGS_TruSeq_P5_12	aatgatacggcgaccaccgagatctacacAACGCGTGacactctttccctacacgacgct	P5 (forward) TruSeq indexing PCR primer, index sequence in CAPS
oNGS_TruSeq_P5_13	aatgatacggcgaccaccgagatctacacAATGTTGCacactctttccctacacgacgct	P5 (forward) TruSeq indexing PCR primer, index sequence in CAPS
oNGS_TruSeq_P5_14	aatgatacggcgaccaccgagatctacacACCTGCAGacactctttccctacacgacgct	P5 (forward) TruSeq indexing PCR primer, index sequence in CAPS
oNGS_TruSeq_P5_15	aatgatacggcgaccaccgagatctacacATCGTCCCacactctttccctacacgacgct	P5 (forward) TruSeq indexing PCR primer, index sequence in CAPS
oNGS_TruSeq_P5_16	aatgatacggcgaccaccgagatctacacCACTTGAAacactctttccctacacgacgct	P5 (forward) TruSeq indexing PCR primer, index sequence in CAPS
oNGS_TruSeq_P5_17	aatgatacggcgaccaccgagatctacacCCCAGTATacactctttccctacacgacgct	P5 (forward) TruSeq indexing PCR primer, index sequence in CAPS
oNGS_TruSeq_P5_18	aatgatacggcgaccaccgagatctacacCGACAAATacactctttccctacacgacgct	P5 (forward) TruSeq indexing PCR primer, index sequence in CAPS
oNGS_TruSeq_P5_19	aatgatacggcgaccaccgagatctacacCGGAGCCGacactctttccctacacgacgct	P5 (forward) TruSeq indexing PCR primer, index sequence in CAPS
oNGS_TruSeq_P5_20	aatgatacggcgaccaccgagatctacacCGGGTCACacactctttccctacacgacgct	P5 (forward) TruSeq indexing PCR primer, index sequence in CAPS
oNGS_TruSeq_P5_21	aatgatacggcgaccaccgagatctacacGAAATCCGacactctttccctacacgacgct	P5 (forward) TruSeq indexing PCR primer, index sequence in CAPS
oNGS_TruSeq_P5_22	aatgatacggcgaccaccgagatctacacTATATGTGacactctttccctacacgacgct	P5 (forward) TruSeq indexing PCR primer, index sequence in CAPS
oNGS_TruSeq_P5_23	aatgatacggcgaccaccgagatctacacTCAGGCTGacactctttccctacacgacgct	P5 (forward) TruSeq indexing PCR primer, index sequence in CAPS
oNGS_TruSeq_P5_24	aatgatacggcgaccaccgagatctacacTCTACATCacactctttccctacacgacgct	P5 (forward) TruSeq indexing PCR primer, index sequence in CAPS
oNGS_TruSeq_P5_25	aatgatacggcgaccaccgagatctacacTGTGTCCAacactctttccctacacgacgct	P5 (forward) TruSeq indexing PCR primer, index sequence in CAPS
oNGS_TruSeq_P5_26	aatgatacggcgaccaccgagatctacacTTGCTTTCacactctttccctacacgacgct	P5 (forward) TruSeq indexing PCR primer, index sequence in CAPS
oNGS_TruSeq_P5_27	aatgatacggcgaccaccgagatctacacCACGCTACacactctttccctacacgacgct	P5 (forward) TruSeq indexing PCR primer, index sequence in CAPS
oNGS_TruSeq_P5_28	aatgatacggcgaccaccgagatctacacCGTTGGTGacactctttccctacacgacgct	P5 (forward) TruSeq indexing PCR primer, index sequence in CAPS
oNGS_TruSeq_P5_29	aatgatacggcgaccaccgagatctacacCTGATATGacactctttccctacacgacgct	P5 (forward) TruSeq indexing PCR primer, index sequence in CAPS
oNGS_TruSeq_P5_30	aatgatacggcgaccaccgagatctacacTGAACAGGacactctttccctacacgacgct	P5 (forward) TruSeq indexing PCR primer, index sequence in CAPS
oNGS_TruSeq_P5_31	aatgatacggcgaccaccgagatctacacTGCCGCGCacactctttccctacacgacgct	P5 (forward) TruSeq indexing PCR primer, index sequence in CAPS
oNGS_TruSeq_P5_32	aatgatacggcgaccaccgagatctacacTTCCGTGGacactctttccctacacgacgct	P5 (forward) TruSeq indexing PCR primer, index sequence in CAPS
oNGS_TruSeq_P7_1	caagcagaagacggcatacgagatCGAGTAATgtgactggagttcagacgtgtgctcttc	P7 (reverse) TruSeq indexing PCR primer, index sequence in CAPS
oNGS_TruSeq_P7_2	caagcagaagacggcatacgagatTCTCCGGAgtgactggagttcagacgtgtgctcttc	P7 (reverse) TruSeq indexing PCR primer, index sequence in CAPS
oNGS_TruSeq_P7_3	caagcagaagacggcatacgagatAATGAGCGgtgactggagttcagacgtgtgctcttc	P7 (reverse) TruSeq indexing PCR primer, index sequence in CAPS
oNGS_TruSeq_P7_4	caagcagaagacggcatacgagatGGAATCTCgtgactggagttcagacgtgtgctcttc	P7 (reverse) TruSeq indexing PCR primer, index sequence in CAPS
oNGS_TruSeq_P7_5	caagcagaagacggcatacgagatTTCTGAATgtgactggagttcagacgtgtgctcttc	P7 (reverse) TruSeq indexing PCR primer, index sequence in CAPS
oNGS_TruSeq_P7_6	caagcagaagacggcatacgagatACGAATTCgtgactggagttcagacgtgtgctcttc	P7 (reverse) TruSeq indexing PCR primer, index sequence in CAPS
oNGS_TruSeq_P7_7	caagcagaagacggcatacgagatAGCTTCAGgtgactggagttcagacgtgtgctcttc	P7 (reverse) TruSeq indexing PCR primer, index sequence in CAPS
oNGS_TruSeq_P7_8	caagcagaagacggcatacgagatGCGCATTAgtgactggagttcagacgtgtgctcttc	P7 (reverse) TruSeq indexing PCR primer, index sequence in CAPS
oNGS_TruSeq_P7_9	caagcagaagacggcatacgagatCATAGCCGgtgactggagttcagacgtgtgctcttc	P7 (reverse) TruSeq indexing PCR primer, index sequence in CAPS
oNGS_TruSeq_P7_10	caagcagaagacggcatacgagatTTCGCGGAgtgactggagttcagacgtgtgctcttc	P7 (reverse) TruSeq indexing PCR primer, index sequence in CAPS
oNGS_TruSeq_P7_11	caagcagaagacggcatacgagatGCGCGAGAgtgactggagttcagacgtgtgctcttc	P7 (reverse) TruSeq indexing PCR primer, index sequence in CAPS
oNGS_TruSeq_P7_12	caagcagaagacggcatacgagatCTATCGCTgtgactggagttcagacgtgtgctcttc	P7 (reverse) TruSeq indexing PCR primer, index sequence in CAPS

## Sheet: Supplementary Table 4
Supplementary Table 4. Oligo sequences for in situ amplification of sgRNA sequences.
Vector	Reverse Transcription Primer	Padlock	Sequencing by Synthesis Primer
CROPseq-Guide-Puro (Addgene #86708) or CROPseq-Guide-Zeo (Addgene #127173)	oRT_CROPseq	oPD_CROPseq	oSBS_CROPseq
	G+AC+TA+GC+CT+TA+TT+TTAACTTGCTAT	/5Phos/gttttagagctagaaatagcaagCTCCTGTTCGACACCTACCCACCTCATCCCACTCTTCAaaaggacgaaacaccg	CACCTCATCCCACTCTTCAaaaggacgaaacaccg
CROPseq-puro-v2 (Addgene #127458)	oRT_CROPseq-v2	oPD_CROPseq-v2	oSBS_CROPseq-v2
	A+CT+CG+GT+GC+CA+CT+TTTTCAA	/5Phos/GTTTCAGAGCTATGCTCTCCTGTTCGCCAAATTCTACCCACCACCCACTCTCCAaaggacgaaaCACCg	GCCAAATTCTACCCACCACCCACTCTCCAaaggacgaaaCACCg
LentiGuide-BC-EF1a-Puro (Addgene #127170)	oRT_LentiGuide-BC	oPD_LentiGuide-BC	oSBS_LentiGuide-BC
	G+AC+GT+GT+GC+TT+AC+CCAAAGG	/5Phos/actggctattcattcgcCTCCTGTTCGACAGTCAGCCGCATCTGCGTCTATTTAGTGGAGCCCTTGtgttcaatcaacattcc	TTCGACAGTCAGCCGCATCTGCGTCTATTTAGTGGAGCCCTTGtgttcaatcaacattcc
